# Supplementary material for: Normal distal pulmonary vein anatomy
Source: PeerJ. 2016 Jan 14;4:e1579. doi: 10.7717/peerj.1579 (PMC4715466; doi:10.7717/peerj.1579)
Supplement: Supplemental Information 1 [file peerj-04-1579-s001.xlsx]

## Sheet: Sheet1
			Ostium diameter (mm):					Ostium-to-last-tributary (mm):
n	number of ostia	other type	left superior	left inferior	right superior	right inferior	others	left superic	left inferio	right super	right inferi	others
1	4		17,7	27,1	18,2	22,5		23,4	21,7	12,9	15,7
2	4		14,8	11,1	14,5	13,2		10,6	15,0	5,2	11,0
3	4		19,7	19,1	16,3	21,8		17,8	12,2	13,2	11,0
4	3	left inferior (-)	13,9		13,4	12,5		16,1		12,4	10,8
5	4	common left + additional middle right	18,5		16,0	11,9	4,8	12,4		4,9	2,8	3,7
6	4		15,7	13,9	15,4	17,4		13,3	13,4	11,4	10,8
7	5	middle right	14,6	15,2	13,7	15,7	8,8	14,7	37,7	13,7	8,7	17,7
8	5	middle right	21,2	19,6	20,0	19,9	22,0	28,3	21,5	14,3	13,7	10,4
9	4		14,7	19,9	15,6	16,8		21,0	15,3	7,5	11,6
10	4		8,2	9,1	10,8	10,4		13,0	11,3	3,8	4,0
11	5	middle right	16,8	12,8	16,5	10,0	11,3	18,9	13,3	11,3	8,0	10,0
12	5	middle right	15,3	13,2	18,9	12,6	11,3	15,6	19,8	8,7	8,5	5,8
13	4		17,2	15,3	12,2	14,8		10,3	14,2	7,4	9,3
14	5	middle right	16,3	7,8	9,4	6,2	12,6	7,9	6,0	14,8	6,4	5,2
15	4		15,5	20,0	16,0	20,0		20,7	16,8	17,2	13,1
16	4		15,8	14,4	15,0	17,2		14,0	16,0	19,0	16,8
17	4		17,0	14,0	15,8	19,2		20,5	12,8	22,0	16,7
18	4		15,8	13,8	18,9	14,2		10,3	12,0	4,8	7,8
19	6	middle right + middle left	10,4	7,6	10,3	10,4	5,5(L)/4,6(R)	11,0	12,3	10,3	7,3	14,2(L)/4,6(R)
20	5	middle right	10,2	3,7	9,3	6,5	4,6	10,5	8,9	7,6	8,6	4,0
21	5	middle right	14,4	13,6	12,9	10,6	7,5	10,1	11,9	17,7	11,2	7,2
22	4		19,1	14,8	11,0	15,4		16,7	13,4	7,2	6,3
23	4		14,0	10,0	16,6	11,5		10,2	11,7	9,0	9,6
24	4		12,4	12,3	10,2	12,1		11,2	12,4	11,6	6,7
25	4		12,0	14,5	17,8	13,6		10,6	13,6	12,0	9,0
26	4		15,1	13,7	17,6	15,7		10,4	7,6	9,2	10,3
27	4		19,0	18,4	11,7	15,9		16,8	9,0	9,5	9,7
28	4		13,4	14,6	14,8	14,5		20,4	17,2	10,9	8,0
29	4		14,2	9,2	10,1	12,0		15,8	15,3	11,6	4,0
30	4		16,3	11,0	19,5	9,4		15,6	6,9	16,0	6,2
31	5	middle right	8,3	12,0	7,3	9,5	5,8	13,0	5,9	8,8	13,0	6,3
32	4		14,9	8,6	12,8	11,6		10,2	6,4	7,6	8,5
33	4		11,6	13,2	12,9	13,0		9,8	7,8	13,9	11,3
34	4		13,3	15,0	14,0	15,5		9,7	14,4	10,0	8,7
35	4		10,0	11,6	12,0	12,0		10,9	10,3	14,0	13,0
36	2	lack of inferior veins	9,2		11,0			12,0		10,7
37	4		16,0	13,0	17,0	15,6		14,2	17,7	15,0	15,0
38	4		15,6	12,5	14,7	12,9		8,0	9,8	13,6	8,0
39	4		17,7	8,9	11,8	13,6		11,4	12,3	12,6	9,0
40	5	middle right	11,1	10,7	12,0	9,4	2,1	10,4	7,9	7,5	7,8	4,9
41	5	middle right	11,9	11,8	6,4	6,7	5,8	10,8	17,1	9,5	10,3	10,6
42	4		9,4	10,2	10,4	12,7		19,7	13,0	10,8	9,7
43	4		16,8	22,0	15,8	21,8		18,9	11,0	18,7	10,5
44	4		14,2	13,5	15,3	16,3		14,6	10,2	9,2	14,6
45	4		10,6	12,7	17,5	9,5		14,1	19,8	9,4	14,3
46	4		12,7	12,0	18,2	16,0		20,8	19,8	6,6	11,4
47	4		12,6	14,3	13,2	15,9		12,0	18,9	6,4	10,6
48	4		13,8	11,4	11,7	13,0		11,8	8,6	6,5	7,0
49	4		11,0	10,0	16,3	15,6		9,3	12,7	12,5	19,3
50	4		15,7	14,2	12,7	13,0		19,8	15,6	12,0	14,0
51	5	middle right	9,9	9,5	8,5	4,9	2,8	10,7	9,4	13,9	9,3	5,0
52	4		11,5	10,7	8,5	8,1		13,4	17,9	16,5	12,7
53	4		10,4	15,6	15,6	12,5		19,6	12,8	15,0	16,5
54	4		15,2	14,8	16,2	15,7		18,7	21,3	17,5	18,1
55	5	middle right	9,9	11,9	11,9	14,6	4,8	20,2	8,6	12,1	6,6	6,6
56	4		12,5	9,3	16,9	14,5		26,0	22,3	13,8	16,3
57	4		8,6	10,7	16,3	13,8		17,3	14,7	16,8	11,8
58	4		15,8	15,3	13,5	13,8		19,8	16,0	10,4	14,8
59	4		19,3	14,3	13,0	18,0		17,5	16,3	16,9	12,4
60	5	middle left	7,5	9,0	12,3	11,2	9,7	12,7	18,7	12,0	19,5	10,5
61	4		11,1	10,6	14,5	9,8		10,8	6,8	9,5	6,9
62	4		10,5	12,1	16,4	13,0		10,4	13,2	18,5	14,5
63	4		12,2	10,1	11,1	7,9		9,5	9,5	10,3	7,9
64	4		13,8	12,6	17,1	12,0		20,1	17,2	8,9	8,6
65	5	middle right	16,0	13,8	13,1	17,8	5,8	14,9	22,0	11,6	10,5	11,3
66	4		9,7	8,0	13,3	7,4		18,2	13,4	11,4	15,2
67	5	middle right	14,3	12,4	11,9	14,0	9,7	14,4	15,7	15,7	15,6	6,1
68	4		14,8	16,3	14,7	16,5		14,3	15,0	14,0	18,6
69	4		11,9	9,6	13,9	11,7		12,3	8,5	13,2	11,2
70	4		14,2	12,3	15,8	15,0
71	4		6,2	12,5	13,7	10,5		12,7	14,8	9,8	12,9
72	4		18,9	19,1	17,4	16,4		22,9	22,2	15,5	22,2
73	5	middle right	12,9	11,0	11,3	9,4	6,3	13,4	10,6	12,6	23,0	8,8
74	4		13,9	14,6	12,0	15,2		9,4	19,6	22,0	12,0
75	5	middle right	9,8	7,2	17,7	18,1	8,1	31,3	24,1	11,8	10,9	5,6
76	4		13,5	11,5	14,8	14,6		20,4	18,5	20,3	15,0
77	4		10,7	13,4	18,5	15,3		18,2	15,4	6,2	9,3
78	4		14,5	13,7	16,4	9,0		10,9	19,0	12,5	10,5
79	4		12,7	15,4	12,5	15,1		20,2	20,0	19,0	18,0
80	4		9,6	8,5	9,7	7,5		10,9	10,0	10,1	5,7
81	4		14,1	8,2	15,1	14,4		18,9	15,4	14,5	11,5
82	4	common left + additional middle right	23,2		7,6	15,7	10,6
83	4		16,6	13,6	16,7	16,0		27,0	14,6	19,1	8,9
84	6	four right PVs	14,3	13,8	13,4	6,7	9,2(s)/6,4(i)	15,2	12,0	12,2	21,0	9,4(s)/7,9(i)
85	5	middle right	11,5	10,7	16,1	12,5	11,3	10,2	17,2	19,0	12,4	7,7
86	3	common left	25,9		20,2	14,7		27,0		12,1	14,4
87	4		10,2	9,6	11,0	10,5		17,6	14,2	11,4	10,1
88	4		14,8	12,6	12,1	11,6		18,3	12,4	8,3	16,0
89	4		14,8	13,4	12,0	11,7		16,6	11,1	11,9	9,8
90	4		11,6	11,2	17,2	18,9		19,9	18,5	8,0	6,0
91	4		12,9	11,7	12,1	9,8		16,9	12,3	10,6	11,0
92	4		15,6	13,3	12,6	12,2		17,9	17,5	7,5	7,7
93	4		10,5	4,4	7,6	5,3		13,1	15,3	11,3	7,8
94	4		15,8	14,8	15,3	14,6		20,3	17,4	13,8	10,5
95	4		15,6	16,9	14,4	13,8		20,8	16,1	13,6	11,9
96	5	middle right	12,6	9,7	11,0	14,2	8,9	8,2	12,5	10,8	14,0	7,0
97	4		16,8	15,4	15,4	16,8		24,1	18,8	18,3	19,0
98	5	middle right	11,0	14,0	10,2	13,8	10,0	18,1	15,0	11,6	15,7	13,0
99	3	common left	19,7		7,2	12,0		14,5		8,9	9,0
100	5	middle right	15,1	10,5	16,3	14,8	7,0	18,0	14,0	10,4	8,0	6,2
101	5	middle right	15,0	14,5	15,1	10,9	3,3	12,6	8,1	8,3	8,4	7,9
102	4		12,6	12,1	19,7	15,4		15,3	15,3	16,2	13,2
103	5	middle right	13,8	13,3	7,5	15,2	6,6	10,2	12,7	7,5	8,6	5,4
104	4		13,6	10,2	13,6	12,7		14,6	10,6	9,6	15,5
105	5	middle right	12,1	11,0	17,1	13,8	10,6	16,0	6,9	10,8	13,5	4,4
106	4		14,4	16,4	16,4	9,4		12,0	10,2	8,9	5,6
107	4		13,3	15,9	11,9	11,8		16,9	11,9	11,5	8,7
108	4		19,8	13,6	21,7	20,3		17,1	7,5	13,8	9,5
109	4		15,9	8,6	10,4	11,9
110	5	middle right	11,3	13,0	10,5	15,6	11,1	8,7	7,7	8,9	13,4	5,1
111	3	common left	12,9		11,8	13,6		6,6		7,3	9,4
112	3	common left	10,3		11,2	12,7		14,1		11,0	10,4
113	4		10,7	16,6	17,6	18,4		10,6	12,3	12,5	8,3
114	4		16,9	16,7	14,8	12,3		11,5	6,5	8,3	10,5
115	4		19,1	12,9	15,8	11,6		8,5	6,3	8,9	7,8
116	4		11,6	13,2	12,5	12,2		8,2	10,4	11,2	9,5
117	3	common left	22,9		18,2	17,4		21,0		14,1	8,9
118	4		13,0	12,4	15,9	12,0		11,8	9,2	5,8	7,8
119	4		15,6	18,3	15,9	13,5		9,0	9,8	10,2	6,7
120	4		15,3	17,0	14,0	14,3		8,3	12,0	8,0	7,0
121	4		7,9	11,5	9,0	12,2		10,2	6,1	8,7	11,4
122	4		13,6	15,6	10,0	10,2		12,9	12,6	9,3	5,2
123	4		12,4	9,0	9,0	8,0		8,0	7,0	6,0	10,4
124	3	common left	26,3		9,8	12,0		18,0		9,3	12,0
125	4		14,3	20,0	18,5	14,9		15,5	12,0	13,2	8,0
126	4		12,0	15,5	12,0	15,0		16,0	12,0	9,7	10,5
127	5	middle right	15,0	16,0	12,0	14,0	8,0	19,0	15,0	12,0	10,0	10,0
128	4		12,0	11,0	15,5	12,4		17,8	14,0	15,4	9,0
129	4		14,0	12,0	11,0	12,0		14,0	12,0	10,0	9,0
130	4		7,8	12,0	9,8	12,2		15,0	14,3	10,0	12,2
